# Supplementary material
Source: publisher site journal article supplement (https://journals.iucr.org/services/coeditors/meetings/jmb/2024/AppendixF_IUCrJ.pdf)
Supplement: Supplementary file 1 [file AppendixF_IUCrJ.pdf]

# 2022 Journal Performance Data for: IUCrJ

 Open Access since 2014

ISSN

2052-2525

EISSN

2052-2525

JCR ABBREVIATION

IUCrJ

ISO ABBREVIATION

IUCrJ

## Journal Information

EDITION

Science Citation Index  
Expanded (SCIE)

CATEGORY

CHEMISTRY,  
MULTIDISCIPLINARY - SCIE  
CRYSTALLOGRAPHY - SCIE  
MATERIALS SCIENCE,  
MULTIDISCIPLINARY - SCIE

LANGUAGES

English

REGION

ENGLAND

1ST ELECTRONIC JCR YEAR

2015

## Publisher Information

PUBLISHER

INT UNION  
CRYSTALLOGRAPHY

ADDRESS

2 ABBEY SQ, CHESTER CH1  
2HU, ENGLAND

PUBLICATION FREQUENCY

6 issues/year

# Journal's Performance

## Journal Impact Factor

The Journal Impact Factor (JIF) is a journal-level metric calculated from data indexed in the Web of Science Core Collection. It should be used with careful attention to the many factors that influence citation rates, such as the volume of publication and citations characteristics of the subject area and type of journal. The Journal Impact Factor can complement expert opinion and informed peer review. In the case of academic evaluation for tenure, it is inappropriate to use a journal-level metric as a proxy measure for individual researchers, institutions, or articles. [Learn more](#)

2022 JOURNAL IMPACT FACTOR

3.9

2022 JOURNAL IMPACT FACTOR WITHOUT SELF CITATIONS

3.7

## Journal Impact Factor Trend 2022

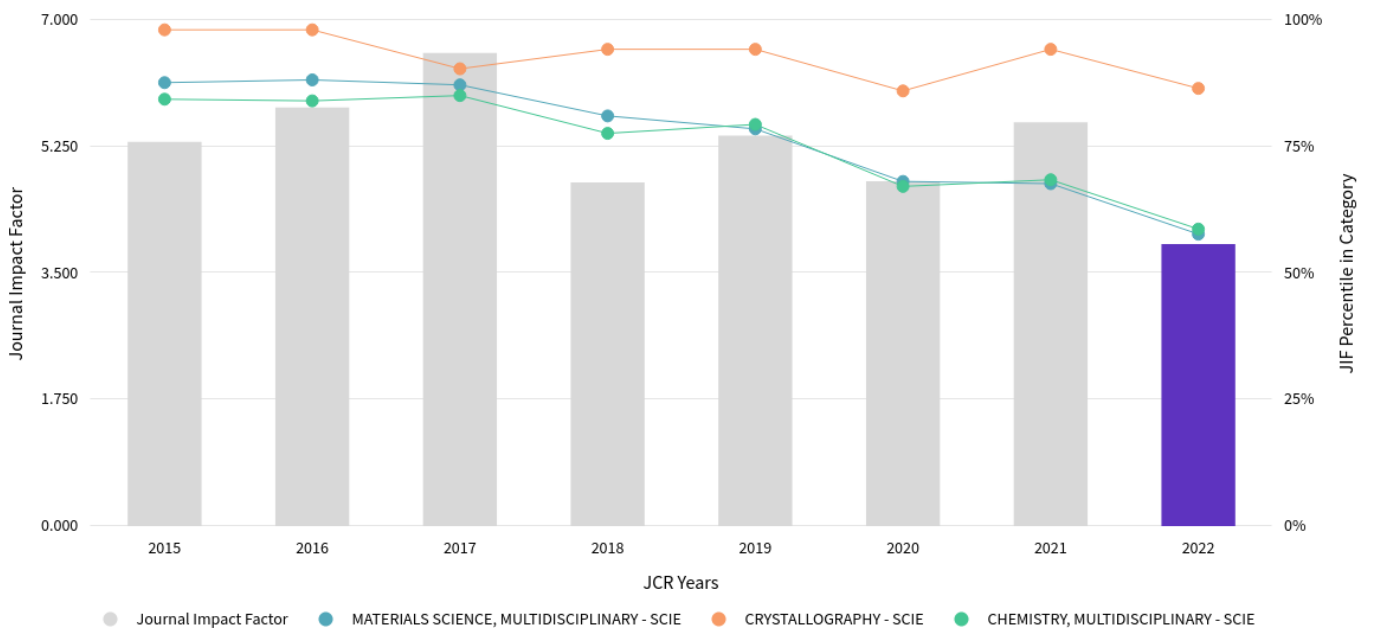

Journal Impact Factor is calculated using the following metrics

$$\frac{\text{Citations in 2022 to items published in 2020 (517) - 2021 (272)}}{\text{Number of citable items in 2020 (112) + 2021 (89)}} = \frac{789}{201} = 3.9$$

Journal Impact Factor without self cites is calculated using the following metrics

$$\frac{\text{Citations in 2022 to items published in 2020 (517) + 2021 (272) - Self Citations in 2022 to items published in 2020 (27) + 2021 (24)}}{\text{Number of citable items in 2020 (112) + 2021 (89)}} = \frac{789 - 51}{201} = 3.7$$

## Journal Impact Factor Contributing Items

### Citable Items (201)

| TITLE                                                                                                                                                                                                                                                                                                                                                                                                                 | CITATION COUNT                                                                              |
|-----------------------------------------------------------------------------------------------------------------------------------------------------------------------------------------------------------------------------------------------------------------------------------------------------------------------------------------------------------------------------------------------------------------------|---------------------------------------------------------------------------------------------|
| <p>Estimation of high-order aberrations and anisotropic magnification from cryo-EM data sets in RELION-3.1<br/>Authors: Zivanov, Jasenko;Nakane, Takanori;Scheres, Sjors H. W.<br/>Volume: 7<br/>Accession number: WOS:000518799300014<br/>Document Type: Article</p>                                                                                                                                                 | 124<br>  |
| <p>Bond-length distributions for ions bonded to oxygen: results for the transition metals and quantification of the factors underlying bond-length variation in inorganic solids<br/>Authors: Gagne, Olivier Charles;Hawthorne, Frank Christopher<br/>Volume: 7<br/>Accession number: WOS:000548507200004<br/>Document Type: Article</p>                                                                              | 20<br>   |
| <p>Electron-event representation data enable efficient cryoEM file storage with full preservation of spatial and temporal resolution<br/>Authors: Guo, Hui;Rubinstein, John L.;Franken, Erik;Deng, Yuchen;Benlekbir, Samir;Lezcano, Garbi Singla;Janssen, Bart;Yu, Lingbo;Ripstein, Zev A.;Tan, Yong Zi<br/>Volume: 7<br/>Accession number: WOS:000568664600012<br/>Document Type: Article</p>                        | 19<br>   |
| <p>Crystal structures of SARS-CoV-2 ADP-ribose phosphatase: from the apo form to ligand complexes<br/>Authors: Michalska, Karolina;Kim, Youngchang;Jedrzejczak, Robert;Maltseva, Natalia, I;Stols, Lucy;Endres, Michael;Joachimiak, Andrzej<br/>Volume: 7<br/>Accession number: WOS:000568664600007<br/>Document Type: Article</p>                                                                                    | 15<br> |
| <p>Observation of substrate diffusion and ligand binding in enzyme crystals using high-repetition-rate mix-and-inject serial crystallography<br/>Authors: Pandey, Suraj;Yefanov, Oleksandr;Zielinski, Kara A.;Bajt, Sasa;Awel, Salah;Doerner, Katarina;Frank, Matthias;Gelasio, Luca;Jernigan, Rebecca;Kirkwood, Henry; et al.<br/>Volume: 8<br/>Accession number: WOS:000715292400006<br/>Document Type: Article</p> | 14<br> |

Showing 1-5 rows of 201 total (use export in the relevant section to download the full table)

## Journal Impact Factor Contributing Items

### Citing Sources (291)

| SOURCE NAME                                                                           | COUNT |
|---------------------------------------------------------------------------------------|-------|
| IUCRJ                                                                                 | 51    |
| NATURE COMMUNICATIONS                                                                 | 45    |
| ACTA CRYSTALLOGRAPHICA SECTION D-STRUCTURAL BIOLOGY                                   | 33    |
| JOURNAL OF APPLIED CRYSTALLOGRAPHY                                                    | 21    |
| CRYSTALS                                                                              | 17    |
| CRYSTENGGCOMM                                                                         | 16    |
| NATURE                                                                                | 15    |
| CHEMICAL REVIEWS                                                                      | 13    |
| COMMUNICATIONS BIOLOGY                                                                | 13    |
| CRYSTAL GROWTH & DESIGN                                                               | 13    |
| ELIFE                                                                                 | 12    |
| CURRENT OPINION IN STRUCTURAL BIOLOGY                                                 | 11    |
| FRONTIERS IN MOLECULAR BIOSCIENCES                                                    | 9     |
| INTERNATIONAL JOURNAL OF MOLECULAR SCIENCES                                           | 9     |
| JOURNAL OF STRUCTURAL BIOLOGY                                                         | 9     |
| SCIENCE                                                                               | 9     |
| SCIENCE ADVANCES                                                                      | 9     |
| SCIENTIFIC REPORTS                                                                    | 9     |
| ACTA CRYSTALLOGRAPHICA A-FOUNDATION AND ADVANCES                                      | 8     |
| ACTA CRYSTALLOGRAPHICA SECTION B-STRUCTURAL SCIENCE CRYSTAL ENGINEERING AND MATERIALS | 8     |

Showing 1-20 rows of 291 total (use export in the relevant section to download the full table)

# Journal Citation Indicator (JCI)

## 1.26

The Journal Citation Indicator (JCI) is the average Category Normalized Citation Impact (CNCI) of citable items (articles & reviews) published by a journal over a recent three year period. The average JCI in a category is 1. Journals with a JCI of 1.5 have 50% more citation impact than the average in that category. It may be used alongside other metrics to help you evaluate journals. [Learn more](#)

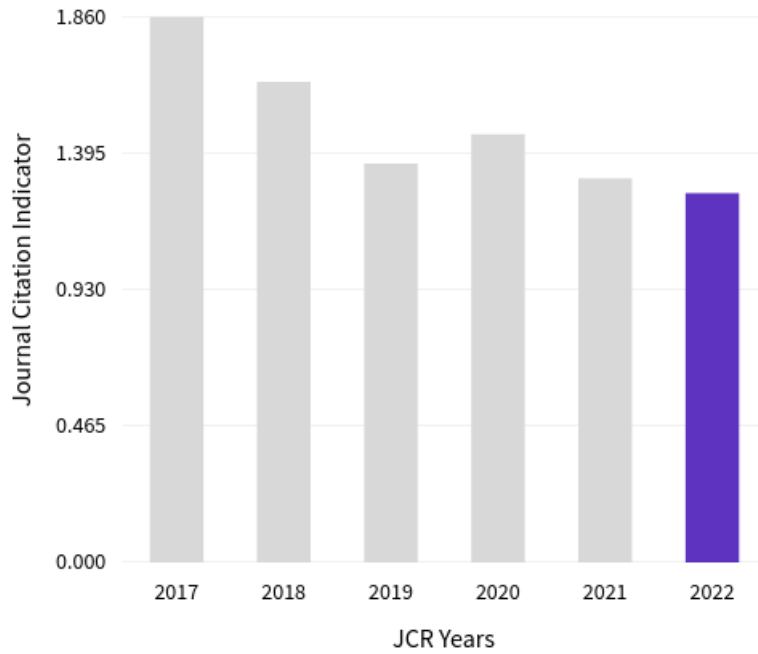

# Total Citations

2,941

The total number of times that a journal has been cited by all journals included in the database in the JCR year. Citations to journals listed in JCR are compiled annually from the JCR years combined database, regardless of which JCR edition lists the journal.

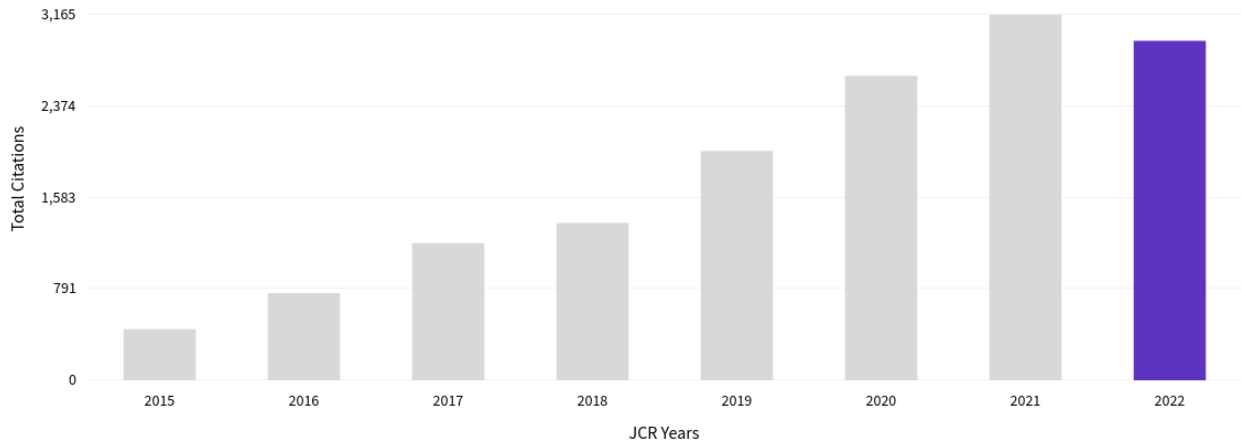

# Citation Distribution

The Citation Distribution shows the frequency with which items published in the year or two years prior were cited in the JCR data year (i.e., the component of the calculation of the JIF). The graph has similar functionality as the JIF Trend graph, including hover-over data descriptions for each data point, and an interactive legend where each data element's legend can be used as a toggle. You can view Articles, Reviews, or Non-Citable (other) items to the JIF numerator. [Learn more](#)

ARTICLE CITATION MEDIAN

**2**

REVIEW CITATION MEDIAN

**3.5**

UNLINKED CITATIONS

**8**

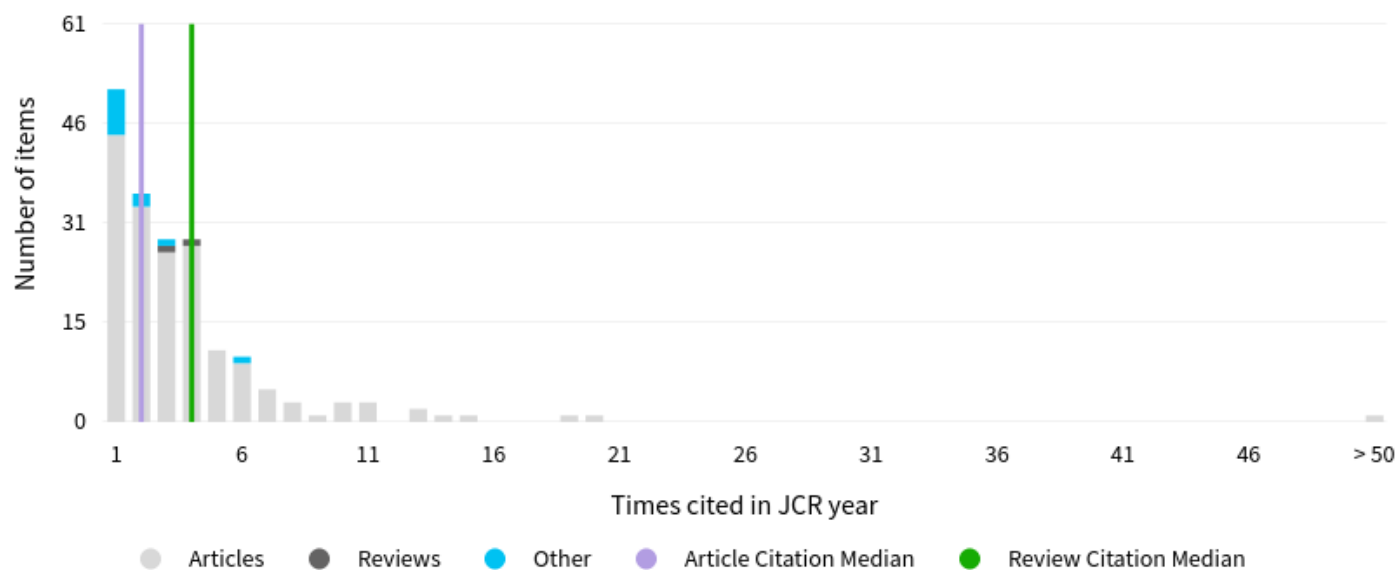

## 0 times cited

ARTICLES

**27**

REVIEWS

**0**

OTHER

**25**

## Open Access (OA)

The data included in this tile summarizes the items published in the journal in the JCR data year and in the previous two years. This three-year set of published items is used to provide descriptive analysis of the content and community of the journal. [Learn more](#)

### Items

TOTAL CITABLE

**271**

% OF CITABLE OA

**100.00%**

CITABLE

● GOLD OPEN ACCESS

271 / 83.13%

● SUBSCRIPTION OR BRONZE

0 / 0.00%

NON-CITABLE

● OTHER (NON-CITABLE ITEMS)

55 / 16.87%

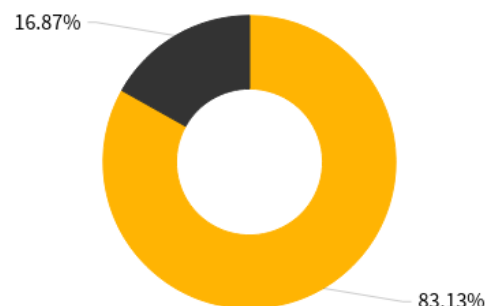

### Citations\*

TOTAL CITABLE

**834**

% OF CITABLE OA

**100.00%**

CITABLE

● GOLD OPEN ACCESS

834 / 95.21%

● SUBSCRIPTION OR BRONZE

0 / 0.00%

NON-CITABLE

● OTHER (NON-CITABLE ITEMS)

24 / 2.74%

● UNLINKED CITATIONS

18 / 2.05%

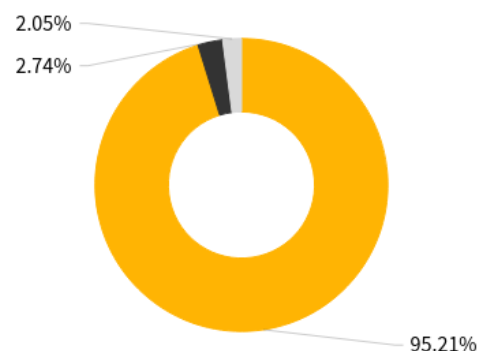

\* Citations in 2022 to items published in (2020-2022)

## Rank by Journal Impact factor

Journals within a category are sorted in descending order by Journal Impact Factor (JIF) resulting in the Category Ranking below. A separate rank is shown for each category in which the journal is listed in JCR. Data for the most recent year is presented at the top of the list, with other years shown in reverse chronological order. [Learn more](#)

### EDITION

Science Citation Index Expanded (SCIE)

### CATEGORY

CHEMISTRY, MULTIDISCIPLINARY

**74/178**

| JCR YEAR | JIF RANK | QUART ILE | JIF PERCENTILE |  |
|----------|----------|-----------|----------------|--|
| 2022     | 74/178   | Q2        | 58.7           |  |
| 2021     | 57/179   | Q2        | 68.44          |  |
| 2020     | 59/178   | Q2        | 67.13          |  |
| 2019     | 37/177   | Q1        | 79.38          |  |
| 2018     | 39/172   | Q1        | 77.62          |  |
| 2017     | 26/171   | Q1        | 85.09          |  |
| 2016     | 27/166   | Q1        | 84.04          |  |
| 2015     | 26/163   | Q1        | 84.36          |  |

### EDITION

Science Citation Index Expanded (SCIE)

### CATEGORY

CRYSTALLOGRAPHY

**4/26**

| JCR YEAR | JIF RANK | QUART ILE | JIF PERCENTILE |  |
|----------|----------|-----------|----------------|--|
| 2022     | 4/26     | Q1        | 86.5           |  |
| 2021     | 2/26     | Q1        | 94.23          |  |
| 2020     | 4/25     | Q1        | 86.00          |  |
| 2019     | 2/26     | Q1        | 94.23          |  |
| 2018     | 2/26     | Q1        | 94.23          |  |
| 2017     | 3/26     | Q1        | 90.38          |  |
| 2016     | 1/26     | Q1        | 98.08          |  |
| 2015     | 1/26     | Q1        | 98.08          |  |

EDITION

Science Citation Index Expanded (SCIE)

CATEGORY

MATERIALS SCIENCE, MULTIDISCIPLINARY

**146/344**

| JCR YEAR | JIF RANK | QUART ILE | JIF PERCENTILE |  |
|----------|----------|-----------|----------------|--|
| 2022     | 146/344  | Q2        | 57.7           |  |
| 2021     | 112/345  | Q2        | 67.68          |  |
| 2020     | 107/334  | Q2        | 68.11          |  |
| 2019     | 68/314   | Q1        | 78.50          |  |
| 2018     | 56/293   | Q1        | 81.06          |  |
| 2017     | 37/285   | Q1        | 87.19          |  |
| 2016     | 33/275   | Q1        | 88.18          |  |
| 2015     | 34/271   | Q1        | 87.64          |  |

## Rank by Journal Citation Indicator (JCI)

Journals within a category are sorted in descending order by Journal Citation Indicator (JCI) resulting in the Category Ranking below. A separate rank is shown for each category in which the journal is listed in JCR. Data for the most recent year is presented at the top of the list, with other years shown in reverse chronological order. [Learn more](#)

### CATEGORY

CHEMISTRY, MULTIDISCIPLINARY

**40/230**

| JCR YEAR | JCI RANK | QUART ILE | JCI PERCENTILE |  |
|----------|----------|-----------|----------------|--|
| 2022     | 40/230   | Q1        | 82.83          |  |
| 2021     | 34/224   | Q1        | 85.04          |  |
| 2020     | 24/219   | Q1        | 89.27          |  |
| 2019     | 28/215   | Q1        | 87.21          |  |
| 2018     | 23/212   | Q1        | 89.39          |  |
| 2017     | 20/205   | Q1        | 90.49          |  |

### CATEGORY

CRYSTALLOGRAPHY

**2/33**

| JCR YEAR | JCI RANK | QUART ILE | JCI PERCENTILE |  |
|----------|----------|-----------|----------------|--|
| 2022     | 2/33     | Q1        | 95.45          |  |
| 2021     | 3/33     | Q1        | 92.42          |  |
| 2020     | 2/33     | Q1        | 95.45          |  |
| 2019     | 3/33     | Q1        | 92.42          |  |
| 2018     | 3/32     | Q1        | 92.19          |  |
| 2017     | 1/31     | Q1        | 98.39          |  |

### CATEGORY

MATERIALS SCIENCE, MULTIDISCIPLINARY

**71/424**

| JCR YEAR | JCI RANK | QUART ILE | JCI PERCENTILE |  |
|----------|----------|-----------|----------------|--|
| 2022     | 71/424   | Q1        | 83.37          |  |
| 2021     | 64/414   | Q1        | 84.66          |  |
| 2020     | 47/384   | Q1        | 87.89          |  |
| 2019     | 49/375   | Q1        | 87.07          |  |
| 2018     | 35/361   | Q1        | 90.44          |  |
| 2017     | 27/343   | Q1        | 92.27          |  |

# Citation network

## Cited Half-life

4.2 years

The Cited Half-Life is the median age of the items in this journal that were cited in the JCR year. Half of a journal's cited items were published more recently than the cited half-life.

TOTAL NUMBER OF CITES

2,941

NON-SELF CITATIONS

2,778

SELF CITATIONS

163

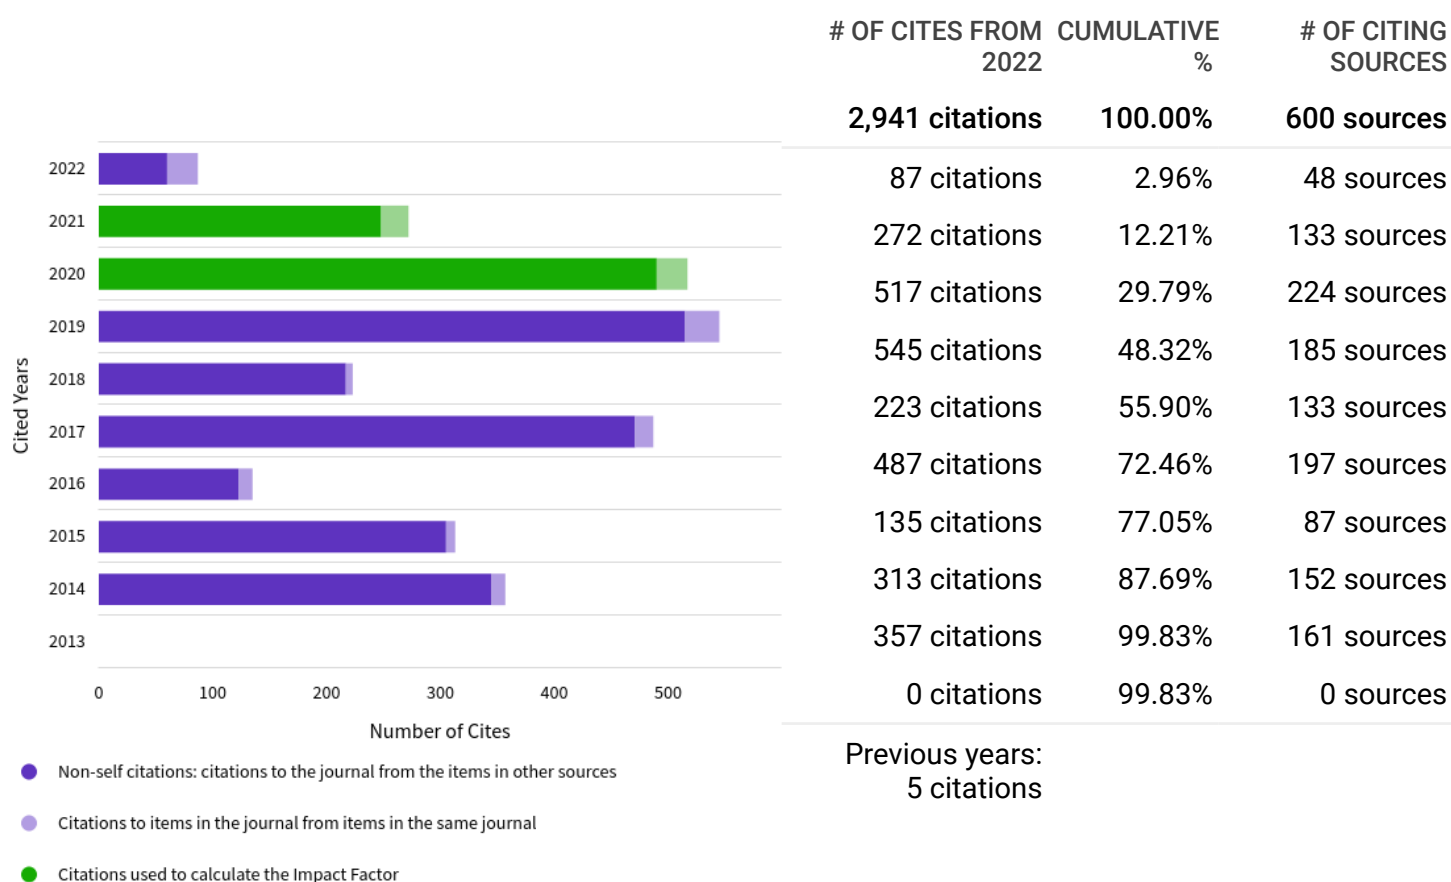

## Citing titles in all years

IUCrJ

|    | SOURCE NAME                                                                           | COUNT |
|----|---------------------------------------------------------------------------------------|-------|
|    | All Others                                                                            | 308   |
| 1  | IUCrJ                                                                                 | 163   |
| 2  | Nature Communications                                                                 | 116   |
| 3  | Acta Crystallographica Section D-Structural Biology                                   | 104   |
| 4  | CRYSTAL GROWTH & DESIGN                                                               | 89    |
| 5  | Journal of Molecular Structure                                                        | 86    |
| 6  | CRYSTENGGCOMM                                                                         | 75    |
| 7  | JOURNAL OF APPLIED CRYSTALLOGRAPHY                                                    | 73    |
| 8  | Crystals                                                                              | 59    |
| 9  | NATURE                                                                                | 43    |
| 10 | JOURNAL OF SYNCHROTRON RADIATION                                                      | 42    |
| 11 | CHEMICAL REVIEWS                                                                      | 41    |
| 12 | Acta Crystallographica Section B-Structural Science Crystal Engineering and Materials | 40    |
| 13 | Frontiers in Molecular Biosciences                                                    | 35    |
| 14 | CURRENT OPINION IN STRUCTURAL BIOLOGY                                                 | 31    |
| 15 | MOLECULES                                                                             | 31    |
| 16 | INTERNATIONAL JOURNAL OF MOLECULAR SCIENCES                                           | 30    |
| 17 | Scientific Reports                                                                    | 30    |
| 18 | PHYSICAL CHEMISTRY CHEMICAL PHYSICS                                                   | 28    |
| 19 | Communications Biology                                                                | 26    |
| 20 | eLife                                                                                 | 25    |

Showing 1 - 20 rows of 289 total (use export in the relevant section to download the full table)

# Citing Half-life

## 8.3 years

The Citing Half-Life is the median age of items in other publications cited by this journal in the JCR year.

TOTAL NUMBER OF CITES

4,783

NON-SELF CITATIONS

4,620

SELF CITATIONS

163

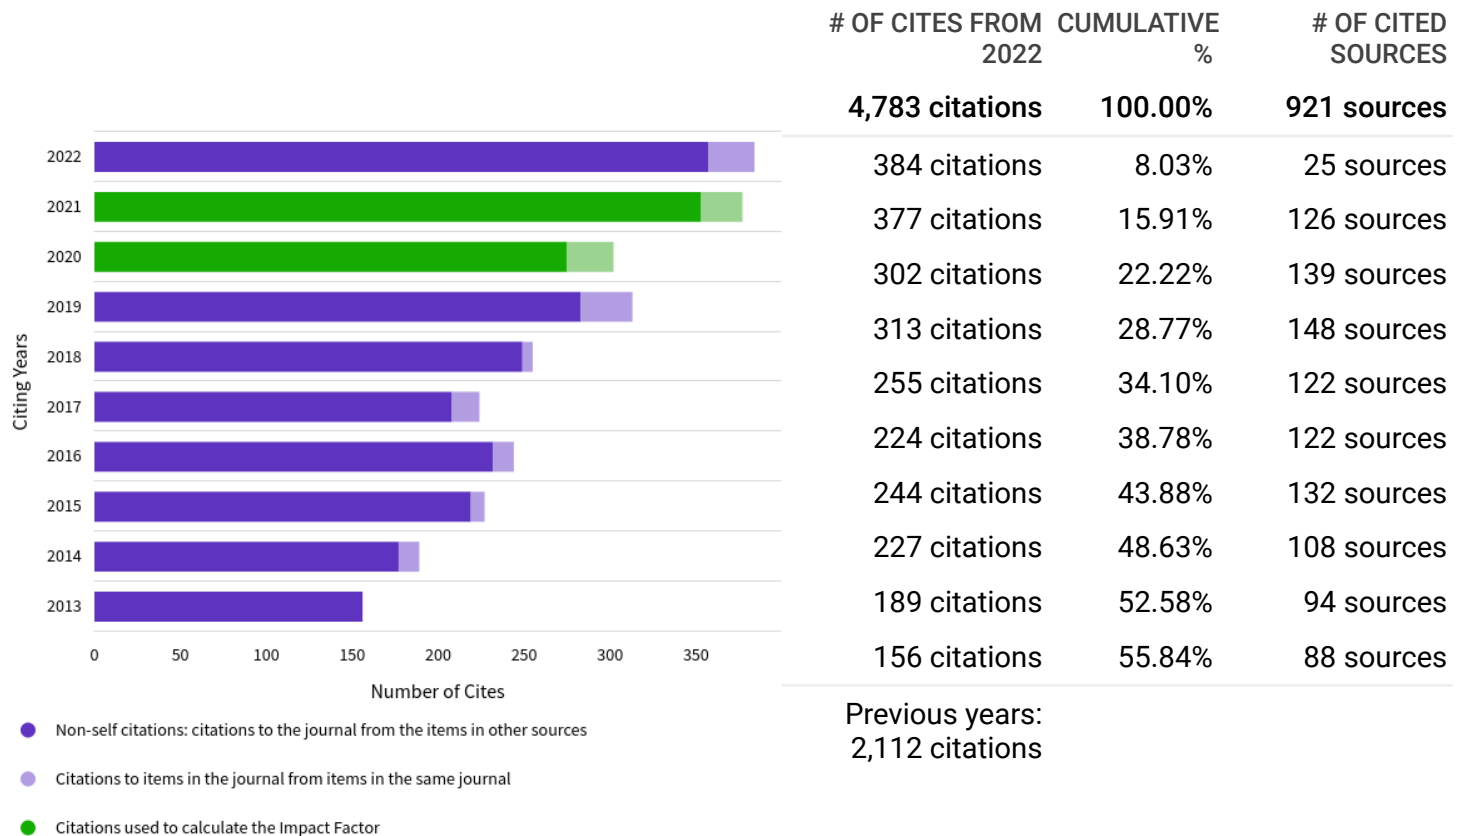

## Cited titles in all years

IUCrJ

|    | SOURCE NAME                                                                           | COUNT |
|----|---------------------------------------------------------------------------------------|-------|
|    | All Others                                                                            | 584   |
| 1  | Acta Crystallographica Section D-Structural Biology                                   | 275   |
| 2  | JOURNAL OF APPLIED CRYSTALLOGRAPHY                                                    | 179   |
| 3  | IUCrJ                                                                                 | 163   |
| 4  | Acta Crystallographica A-Foundation and Advances                                      | 123   |
| 5  | Acta Crystallographica Section B-Structural Science Crystal Engineering and Materials | 121   |
| 6  | NATURE                                                                                | 109   |
| 7  | Journal of the American Chemical Society                                              | 93    |
| 8  | PROCEEDINGS OF THE NATIONAL ACADEMY OF SCIENCES OF THE UNITED STATES OF AMERICA       | 93    |
| 9  | SCIENCE                                                                               | 88    |
| 10 | PHYSICAL REVIEW B                                                                     | 80    |
| 11 | Nature Communications                                                                 | 76    |
| 12 | CRYSTAL GROWTH & DESIGN                                                               | 71    |
| 13 | JOURNAL OF CHEMICAL PHYSICS                                                           | 62    |
| 14 | ANGEWANDTE CHEMIE-INTERNATIONAL EDITION                                               | 58    |
| 15 | PHYSICAL REVIEW LETTERS                                                               | 55    |
| 16 | CRYSTENGGCOMM                                                                         | 45    |
| 17 | NATURE METHODS                                                                        | 41    |
| 18 | BIOCHEMISTRY                                                                          | 40    |
| 19 | JOURNAL OF SYNCHROTRON RADIATION                                                      | 40    |
| 20 | JOURNAL OF STRUCTURAL BIOLOGY                                                         | 36    |

Showing 1 - 20 rows of 283 total (use export in the relevant section to download the full table)

# Journal Citation Relationships

## Cited Data

Top 20 journals citing IUCRJ by number of citations

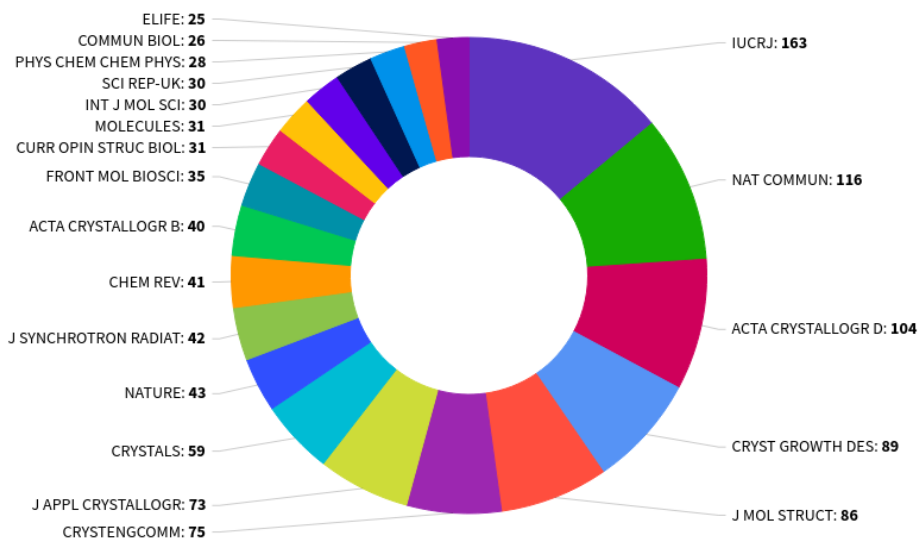

# Citing Data

## Top 20 journals cited by IUCRJ by number of citations

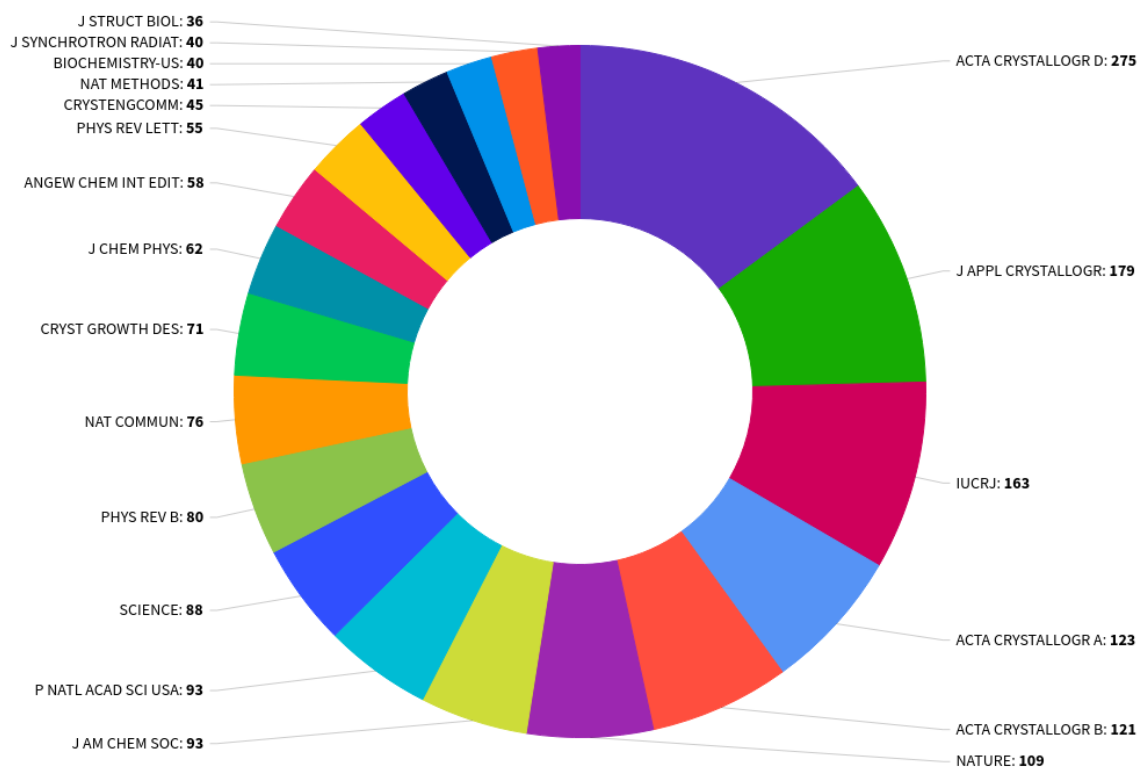

# Content metrics

## Source data

This tile shows the breakdown of document types published by the journal. Citable Items are Articles and Reviews. For the purposes of calculating JIF, a JCR year considers the publications of that journal in the two prior years. [Learn more](#)

## 70 total citable items

|                             | ARTICLES | REVIEWS | COMBINED (C) | OTHER DOCUMENT TYPES (O) | PERCENTAGE |
|-----------------------------|----------|---------|--------------|--------------------------|------------|
| NUMBER IN JCR YEAR 2022 (A) | 67       | 3       | 70           | 19                       | 79%        |
| NUMBER OF REFERENCES (B)    | 4,314    | 261     | 4,575        | 208                      | 96%        |
| RATIO (B/A)                 | 64.4     | 87.0    | 65.4         | 10.9                     |            |

## Average JIF Percentile

The Average Journal Impact Factor Percentile takes the sum of the JIF Percentile rank for each category under consideration, then calculates the average of those values. [Learn more](#)

ALL CATEGORIES AVERAGE

**67.6**

EDITION

Science Citation Index Expanded

MATERIALS SCIENCE,  
MULTIDISCIPLINARY

**57.7**

CHEMISTRY, MULTIDISCIPLINARY

**58.7**

CRYSTALLOGRAPHY

**86.5**

## Contributions by Organizations

Organizations that have contributed the most papers to the journal in the most recent three-year period. [Learn more](#)

| RANK | ORGANIZATION                                        | COUNT |                                                                                    |
|------|-----------------------------------------------------|-------|------------------------------------------------------------------------------------|
| 1    | UNITED STATES DEPARTMENT OF ENERGY (DOE)            | 37    |  |
| 2    | HELMHOLTZ ASSOCIATION                               | 35    |  |
| 3    | SWISS FEDERAL INSTITUTES OF TECHNOLOGY DOMAIN       | 19    |  |
| 4    | DIAMOND LIGHT SOURCE                                | 16    |  |
| 5    | UNIVERSITY OF WARSAW                                | 14    |  |
| 6    | MAX PLANCK SOCIETY                                  | 13    |  |
| 7    | AARHUS UNIVERSITY                                   | 12    |  |
| -    | CENTRE NATIONAL DE LA RECHERCHE SCIENTIFIQUE (CNRS) | 12    |  |

Showing 1 - 8 rows of 445 total (use export in the relevant section to download the full table)

## Contributions by country/region

Countries or Regions that have contributed the most papers to the journal in the most recent three-year period. [Learn more](#)

| RANK | COUNTRY/REGION        | COUNT |                                                                                      |
|------|-----------------------|-------|--------------------------------------------------------------------------------------|
| 1    | USA                   | 96    |  |
| 2    | GERMANY (FED REP GER) | 69    |  |
| 3    | England               | 58    |  |
| 4    | CHINA MAINLAND        | 33    |  |
| 5    | France                | 27    |  |
| 6    | Japan                 | 26    |  |
| -    | Switzerland           | 26    |  |
| 8    | Poland                | 25    |  |

Showing 1 - 8 rows of 47 total (use export in the relevant section to download the full table)

# Additional metrics

## Eigenfactor score

**0.00859**

The Eigenfactor Score is a reflection of the density of the network of citations around the journal using 5 years of cited content as cited by the Current Year. It considers both the number of citations and the source of those citations, so that highly cited sources will influence the network more than less cited sources. The Eigenfactor calculation does not include journal self-citations. [Learn more](#)

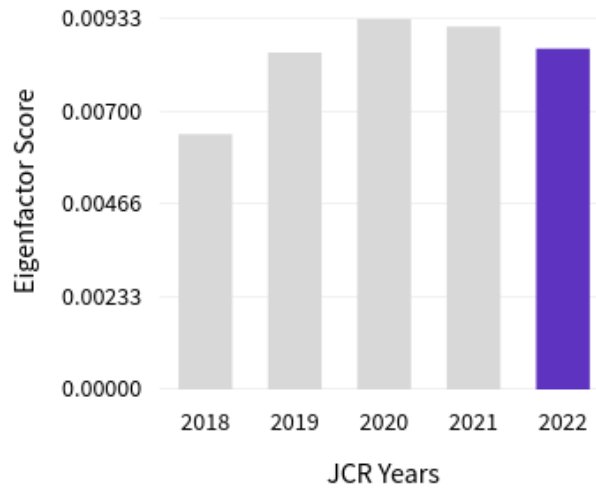

## Normalized Eigenfactor

**1.87146**

The Normalized Eigenfactor Score is the Eigenfactor score normalized, by rescaling the total number of journals in the JCR each year, so that the average journal has a score of 1. Journals can then be compared and influence measured by their score relative to 1. [Learn more](#)

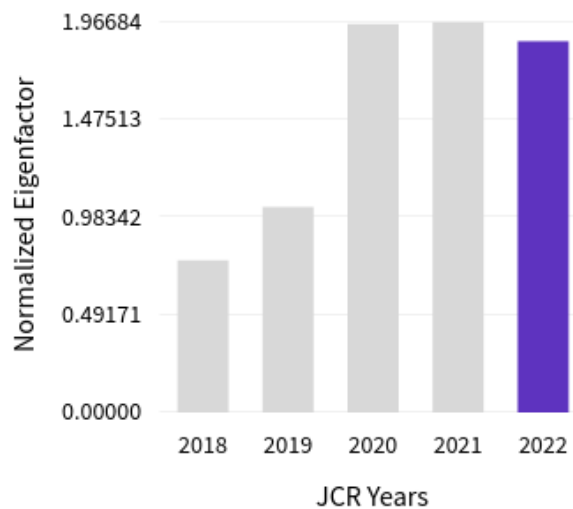

## Article influence score

**2.118**

The Article Influence Score normalizes the Eigenfactor Score according to the cumulative size of the cited journal across the prior five years. The mean Article Influence Score for each article is 1.00. A score greater than 1.00 indicates that each article in the journal has above-average influence. [Learn more](#)

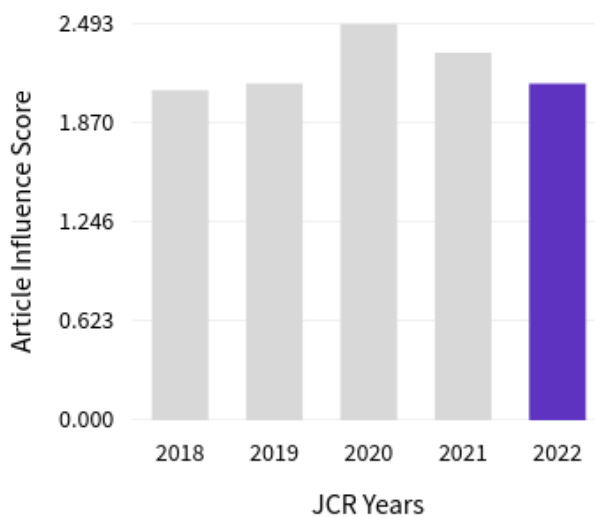

# 5 year Impact Factor

## 4.4

The 5-year Impact Factor is the average number of times articles from the journal published in the past five years have been cited in the JCR year. It is calculated by dividing the number of citations in the JCR year by the total number of articles published in the five previous years.

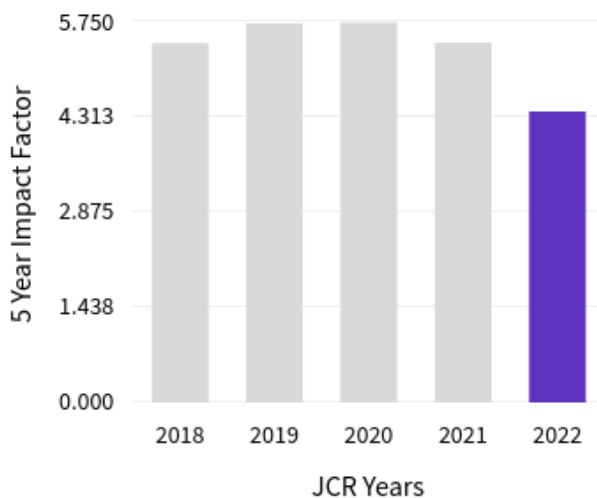

5 year Impact Factor calculation

|                                                                |   |       |   |     |
|----------------------------------------------------------------|---|-------|---|-----|
| Citations in 2022 to items published in [2017-2021]<br>(2,044) | = | 2,044 | = | 4.4 |
| Number of citable items in [2017-2021] (462)                   |   | 462   |   |     |

# Immediacy Index

## 1.2

The Immediacy Index is the count of citations in the current year to the journal that reference content in this same year. Journals that have a consistently high Immediacy Index attract citations rapidly.

[Learn more](#)

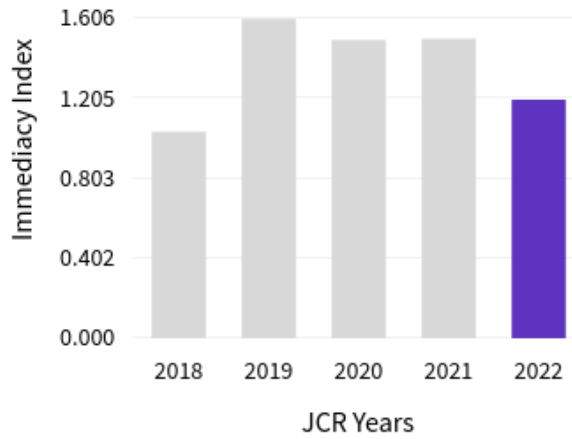

Immediacy Index calculation

|                                          |    |               |
|------------------------------------------|----|---------------|
| Cites in 2022 to items published in 2022 | 87 |               |
| <hr/>                                    |    | 87 / 70 = 1.2 |
| Number of items published in 2022        | 70 |               |
